# Supplementary material
Source: Research Square preprint supplement (doi:10.21203/rs.3.rs-9460892/v1)
Supplement: Supplementary file 1 [file ab9c83bd8e371d1e21360143.xlsx]

## Sheet: 140 full data
YEAR	Firm	ICSR	ISO26000	Employee Welfare	Unethical Behavior	ISO26000 (LN)	ICSR (LN)
2010	ELSA	0.465116	0.545455	11.6558	0.539164	0.606136	0.765468
2011	ELSA	0.44186	0.568182	11.5287	-0.641752	0.565314	0.816761
2012	ELSA	0.465116	0.613636	11.7437	-4.07406	0.488353	0.765468
2013	ELSA	0.44186	0.636364	11.8124	1.95191	0.451985	0.816761
2014	ELSA	0.465116	0.590909	11.8797	2.09025	0.526093	0.765468
2015	ELSA	0.488372	0.613636	11.9005	1.22679	0.488353	0.716678
2016	ELSA	0.511628	0.590909	11.8285	1.27629	0.526093	0.670158
2017	ELSA	0.511628	0.590909	11.9436	0.888523	0.526093	0.670158
2018	ELSA	0.511628	0.727273	11.0392	1.50756	0.318454	0.670158
2019	ELSA	0.581395	0.727273	11.1253	1.30355	0.318454	0.542324
2010	MEDC	0.418605	0.5	11.8915	3.31599	0.693147	0.870828
2011	MEDC	0.418605	0.5	11.5406	1.09522	0.693147	0.870828
2012	MEDC	0.44186	0.590909	11.7902	0.287466	0.526093	0.816761
2013	MEDC	0.418605	0.613636	11.5547	-0.954677	0.488353	0.870828
2014	MEDC	0.44186	0.545455	11.5483	-1.25773	0.606136	0.816761
2015	MEDC	0.372093	0.522727	11.8519	-0.593998	0.648695	0.988611
2016	MEDC	0.395349	0.5	11.8004	-0.41682	0.693147	0.927987
2017	MEDC	0.372093	0.522727	11.0332	1.30563	0.648695	0.988611
2018	MEDC	0.418605	0.545455	11.0205	0.0678571	0.606136	0.870828
2019	MEDC	0.395349	0.522727	11.1645	0.9143	0.648695	0.927987
2010	PGAS	0.55814	0.727273	11.5058	0.881283	0.318454	0.583146
2011	PGAS	0.534884	0.727273	11.6042	1.38416	0.318454	0.625706
2012	PGAS	0.55814	0.818182	11.0825	2.05056	0.200671	0.583146
2013	PGAS	0.534884	0.795455	11.1638	1.98649	0.228842	0.625706
2014	PGAS	0.511628	0.840909	11.2036	2.11717	0.173272	0.670158
2015	PGAS	0.511628	0.795455	11.3234	0.41597	0.228842	0.670158
2016	PGAS	0.534884	0.863636	11.15	1.36144	0.146603	0.625706
2017	PGAS	0.55814	0.931818	11.0328	0.896512	0.0706176	0.583146
2018	PGAS	0.604651	0.863636	11.2883	2.83713	0.146603	0.503104
2019	PGAS	0.55814	0.909091	11.3788	0.90802	0.0953102	0.583146
2010	AKRA	0.44186	0.545455	11.2388	0.480517	0.606136	0.816761
2011	AKRA	0.465116	0.568182	11.2388	6.64466	0.565314	0.765468
2012	AKRA	0.465116	0.613636	11.2495	0.0955542	0.488353	0.765468
2013	AKRA	0.44186	0.636364	11.4	0.780494	0.451985	0.816761
2014	AKRA	0.395349	0.590909	11.5074	0.60292	0.526093	0.927987
2015	AKRA	0.44186	0.613636	11.5543	1.79793	0.488353	0.816761
2016	AKRA	0.465116	0.590909	11.5435	0.799478	0.526093	0.765468
2017	AKRA	0.465116	0.590909	11.5345	1.75988	0.526093	0.765468
2018	AKRA	0.465116	0.727273	11.587	1.11766	0.318454	0.765468
2019	AKRA	0.488372	0.727273	11.6322	0.385499	0.318454	0.716678
2010	RAJA	0.209302	0.272727	11.9319	-14.7802	1.29928	1.56398
2011	RAJA	0.186047	0.272727	11.5716	-4.59186	1.29928	1.68176
2012	RAJA	0.209302	0.272727	11.7327	3.13041	1.29928	1.56398
2013	RAJA	0.27907	0.454545	11.8677	0.261938	0.788457	1.27629
2014	RAJA	0.302326	0.454545	11.8922	3.47612	0.788457	1.19625
2015	RAJA	0.325581	0.454545	11.9383	-0.622426	0.788457	1.12214
2016	RAJA	0.325581	0.477273	11.863	1.19549	0.739667	1.12214
2017	RAJA	0.348837	0.477273	11.8978	1.87361	0.739667	1.05315
2018	RAJA	0.395349	0.5	11.9662	0.914788	0.693147	0.927987
2019	RAJA	0.465116	0.5	11.929	1.02247	0.693147	0.765468
2010	PHE	0.581395	0.818182	11.0821	8.74469	0.200671	0.542324
2011	PHE	0.581395	0.840909	11.2313	0.602641	0.173272	0.542324
2012	PHE	0.581395	0.840909	11.4551	3.20505	0.173272	0.542324
2013	PHE	0.627907	0.863636	11.7819	1.64141	0.146603	0.465363
2014	PHE	0.697674	0.909091	11.8707	0.685003	0.0953102	0.360003
2015	PHE	0.674419	0.954545	11.2492	0.382685	0.04652	0.393904
2016	PHE	0.651163	0.909091	11.5501	0.926401	0.0953102	0.428996
2017	PHE	0.674419	0.886364	11.1196	1.74209	0.120628	0.393904
2018	PHE	0.674419	0.909091	11.6474	2.58186	0.0953102	0.393904
2019	PHE	0.697674	0.931818	11.1314	1.94442	0.0706176	0.360003
2010	Petronas	0.534884	0.75	11.2392	-0.860253	0.287682	0.625706
2011	Petronas	0.627907	0.75	11.2957	3.39723	0.287682	0.465363
2012	Petronas	0.651163	0.772727	11.3611	1.51015	0.257829	0.428996
2013	Petronas	0.674419	0.795455	11.4478	1.53129	0.228842	0.393904
2014	Petronas	0.674419	0.772727	11.4875	2.47731	0.257829	0.393904
2015	Petronas	0.627907	0.795455	11.4724	1.97074	0.228842	0.465363
2016	Petronas	0.604651	0.75	11.3993	0.179928	0.287682	0.503104
2017	Petronas	0.55814	0.75	11.4724	1.72324	0.287682	0.583146
2018	Petronas	0.627907	0.795455	11.5484	2.2146	0.228842	0.465363
2019	Petronas	0.697674	0.818182	11.5754	1.31541	0.200671	0.360003
2010	MISC	0.581395	0.681818	11.3955	1.45493	0.382992	0.542324
2011	MISC	0.581395	0.681818	11.3704	-1.808	0.382992	0.542324
2012	MISC	0.55814	0.659091	11.4539	0.183015	0.416894	0.583146
2013	MISC	0.488372	0.636364	11.527	2.76682	0.451985	0.716678
2014	MISC	0.581395	0.727273	11.5583	1.68238	0.318454	0.542324
2015	MISC	0.465116	0.613636	11.6872	1.6249	0.488353	0.765468
2016	MISC	0.511628	0.659091	11.6006	1.56328	0.416894	0.670158
2017	MISC	0.55814	0.681818	11.5163	1.78549	0.382992	0.583146
2018	MISC	0.534884	0.681818	11.646	1.30269	0.382992	0.625706
2019	MISC	0.581395	0.818182	11.7326	2.06986	0.200671	0.542324
2010	Genting	0.55814	0.659091	10.7621	1.2957	0.416894	0.583146
2011	Genting	0.55814	0.681818	10.8186	1.87971	0.382992	0.583146
2012	Genting	0.627907	0.681818	10.9107	1.38278	0.382992	0.465363
2013	Genting	0.627907	0.681818	10.9982	1.12195	0.382992	0.465363
2014	Genting	0.627907	0.704545	11.0443	1.45051	0.350202	0.465363
2015	Genting	0.627907	0.704545	11.058	1.44576	0.350202	0.465363
2016	Genting	0.534884	0.659091	11.0124	2.77074	0.416894	0.625706
2017	Genting	0.581395	0.772727	11.1153	1.54447	0.257829	0.542324
2018	Genting	0.581395	0.772727	11.0798	1.16608	0.257829	0.542324
2019	Genting	0.581395	0.772727	11.1189	2.03492	0.257829	0.542324
2010	PetDag	0.534884	0.681818	11.686	1.63893	0.382992	0.625706
2011	PetDag	0.581395	0.727273	11.7279	0.604037	0.318454	0.542324
2012	PetDag	0.581395	0.704545	11.8881	1.44697	0.350202	0.542324
2013	PetDag	0.55814	0.704545	11.8862	1.05208	0.350202	0.583146
2014	PetDag	0.604651	0.772727	11.9751	1.39943	0.257829	0.503104
2015	PetDag	0.674419	0.840909	11.818	1.77256	0.173272	0.393904
2016	PetDag	0.697674	0.840909	11.8064	1.1318	0.173272	0.360003
2017	PetDag	0.72093	0.818182	11.8585	2.21922	0.200671	0.327213
2018	PetDag	0.697674	0.818182	11.9139	0.680798	0.200671	0.360003
2019	PetDag	0.72093	0.840909	11.9976	1.5903	0.173272	0.327213
2010	ADARO	0.627907	0.818182	11.8697	0.631581	0.200671	0.465363
2011	ADARO	0.604651	0.818182	11.5627	2.32432	0.200671	0.503104
2012	ADARO	0.627907	0.840909	11.7096	0.862754	0.173272	0.465363
2013	ADARO	0.604651	0.840909	11.7808	1.29675	0.173272	0.503104
2014	ADARO	0.604651	0.818182	11.8231	1.13246	0.200671	0.503104
2015	ADARO	0.604651	0.818182	11.8323	1.90213	0.200671	0.503104
2016	ADARO	0.604651	0.840909	11.8788	2.20178	0.173272	0.503104
2017	ADARO	0.651163	0.863636	11.9354	1.97757	0.146603	0.428996
2018	ADARO	0.651163	0.886364	12.0057	1.34159	0.120628	0.428996
2019	ADARO	0.627907	0.863636	12.0962	1.36455	0.146603	0.465363
2010	Bumi	0.627907	0.795455	11.3929	1.17585	0.228842	0.465363
2011	Bumi	0.651163	0.795455	11.4093	0.841451	0.228842	0.428996
2012	Bumi	0.674419	0.795455	11.4343	-2.68891	0.228842	0.393904
2013	Bumi	0.674419	0.795455	11.4544	0.0271828	0.228842	0.393904
2014	Bumi	0.674419	0.840909	11.5229	-0.782179	0.173272	0.393904
2015	Bumi	0.674419	0.840909	10.9391	5.0425	0.173272	0.393904
2016	Bumi	0.674419	0.840909	11.024	-1.93599	0.173272	0.393904
2017	Bumi	0.674419	0.863636	11.0616	2.17642	0.146603	0.393904
2018	Bumi	0.697674	0.977273	11.2901	-0.646166	0.0229895	0.360003
2019	Bumi	0.697674	0.977273	11.4438	3.91292	0.0229895	0.360003
2010	DEWA	0.697674	0.772727	11.311	-0.75006	0.257829	0.360003
2011	DEWA	0.697674	0.772727	11.4036	-4.0172	0.257829	0.360003
2012	DEWA	0.697674	0.772727	10.8754	2.07857	0.257829	0.360003
2013	DEWA	0.697674	0.772727	11.0109	1.52567	0.257829	0.360003
2014	DEWA	0.697674	0.795455	11.0437	0.186532	0.228842	0.360003
2015	DEWA	0.697674	0.795455	11.0028	3.88518	0.228842	0.360003
2016	DEWA	0.697674	0.795455	11.0025	0.827405	0.228842	0.360003
2017	DEWA	0.697674	0.795455	10.9741	7.54626	0.228842	0.360003
2018	DEWA	0.697674	0.886364	10.9524	0.355209	0.120628	0.360003
2019	DEWA	0.697674	0.931818	11.0751	1.20507	0.0706176	0.360003
2010	ITMG	0.72093	0.795455	11.0841	3.25899	0.228842	0.327213
2011	ITMG	0.72093	0.795455	11.1084	2.88142	0.228842	0.327213
2012	ITMG	0.72093	0.818182	11.1014	1.10526	0.200671	0.327213
2013	ITMG	0.72093	0.818182	11.3225	1.12706	0.200671	0.327213
2014	ITMG	0.72093	0.886364	11.2324	1.42723	0.120628	0.327213
2015	ITMG	0.744186	0.931818	11.156	1.03308	0.0706176	0.295464
2016	ITMG	0.72093	0.909091	11.1538	2.3685	0.0953102	0.327213
2017	ITMG	0.744186	0.954545	11.286	2.30167	0.04652	0.295464
2018	ITMG	0.744186	0.954545	11.3501	1.23571	0.04652	0.295464
2019	ITMG	0.488372	0.931818	11.3006	2.7924	0.0706176	0.716678
